# Supplementary material for: Serological Investigation and Genetic Characteristics of Pseudorabies Virus between 2019 and 2021 in Henan Province of China
Source: MDPI journal article supplement (doi:10.3390/v14081685), 2022-07-30
Supplement: s1 [file s1]

Table S1. The information of PRV strains isolated in this study and reference strains for sequence alignment and phylogenetic analysis

| Strain     | Species       | Geographical location | Collection time | gE length (bp) | GenBank No |
|------------|---------------|-----------------------|-----------------|----------------|------------|
| HD-1       | Pig           | Handan, Hebei         | 2017            | 1740           | MF409395   |
| HD-2       | Pig           | Handan, Hebei         | 2017            | 1740           | MF409396   |
| PY-1       | Pig           | Puyang, Henan         | 2018            | 1740           | MW073101   |
| SC1        | Pig           | Wenshui, Shanxi       | 2018            | 1740           | MH507059   |
| SC2        | Pig           | Wenshui, Shanxi       | 2018            | 1740           | ON602708   |
| HN-CM      | Pig           | Kaifeng, Henan        | 2019            | 1737           | ON602709   |
| HN-CY      | Pig           | Jiaozuo, Henan        | 2019            | 1737           | ON602710   |
| HN-GM      | Pig           | Zhumadian, Henan      | 2019            | 1737           | ON602711   |
| HN-HY      | Pig           | Puyang, Henan         | 2019            | 1737           | ON602713   |
| HN-LL      | Pig           | Luoyang, Henan        | 2020            | 1737           | ON602715   |
| HN-LH      | Pig           | Luoyang, Henan        | 2020            | 1737           | ON602714   |
| HN-LY      | Pig           | Luoyang, Henan        | 2020            | 1737           | ON602716   |
| HN-YH      | Pig           | Xuchang, Henan        | 2021            | 1740           | ON602720   |
| HN-HX      | Pig           | Jiaozuo, Henan        | 2021            | 1737           | ON602712   |
| HN-MY      | Pig           | Sanmenxia, Henan      | 2021            | 1737           | ON602717   |
| HN-WZ      | Pig           | Puyang, Henan         | 2021            | 1737           | ON602718   |
| HN-XT      | Pig           | Jiaozuo, Henan        | 2021            | 1737           | ON602719   |
| HN-YY      | Pig           | Sanmenxia, Henan      | 2021            | 1737           | ON602721   |
| Fa         | Cow           | China                 | 1962            | 1674           | AF403049   |
| SC         | Pig           | China                 | 1986            | 1737           | KT809429   |
| Ea         | Pig           | China                 | 1999            | 1737           | AF171937   |
| JS-2012    | Pig           | China                 | 2012            | 1740           | KP257591   |
| HeN1       | Pig           | China                 | 2012            | 1740           | KP098534   |
| HN1201     | Pig           | China                 | 2012            | 1740           | KP722022   |
| NY-2012    | Pig           | China                 | 2012            | 1740           | KF130883   |
| TJ         | Pig           | China                 | 2012            | 1740           | KJ789182   |
| ZJ01       | Pig           | China                 | 2012            | 1743           | KM061380   |
| HLJ8       | Pig           | China                 | 2013            | 1740           | KT824771   |
| Anhui-CZ33 | Pig           | China                 | 2017            | 1739           | MK934522   |
| HeNLH      | Pig           | China                 | 2017            | 1740           | MT775883   |
| HuN-YY     | Pig           | China                 | 2018            | 1737           | MZ501781   |
| hSD-1      | Human         | China                 | 2019            | 1740           | MT468550   |
| HuB17      | Pig           | China                 | 2020            | 1737           | MT949537   |
| Kaplan     | Pig           | Hungary               | 1959            | 1734           | JF797218   |
| NIA-1      | Pig           | Northern Ireland      | 1962            | 1734           | FJ605136   |
| Becker     | Pig           | USA                   | 1967            | 1734           | JF797219   |
| NS374      | Pig           | Belgium               | 1971            | 1731           | FJ605135   |
| 75V19      | Pig           | Belgium               | 1975            | 1734           | FJ605133   |
| 89V87      | Pig           | Belgium               | 1989            | 1734           | FJ605134   |
| Yangsang   | Pig           | South Korea           | 1996            | 1734           | AY249861   |
| 00V72      | Pig           | Belgium               | 2000            | 1734           | FJ605132   |
| P-PrV      | Pig           | Malaysia              | 2003            | 1737           | FJ176390   |
| Hercules   | Pig           | Greece                | 2010            | 1734           | KT983810   |
| Kolchis    | Pig           | Greece                | 2010            | 1734           | KT983811   |
| RC1        | Procyon lotor | Japan                 | 2016            | 1725           | LC342744   |
| NIA3       | Pig           | UK                    | 2016            | 1734           | KU900059   |

Note: Strains are represented at the front of the table
