# Supplementary material for: Serological Investigation and Genetic Characteristics of Pseudorabies Virus between 2019 and 2021 in Henan Province of China
Source: MDPI journal article supplement (doi:10.3390/v14081685), 2022-07-30
Supplement: s1 [file s1]

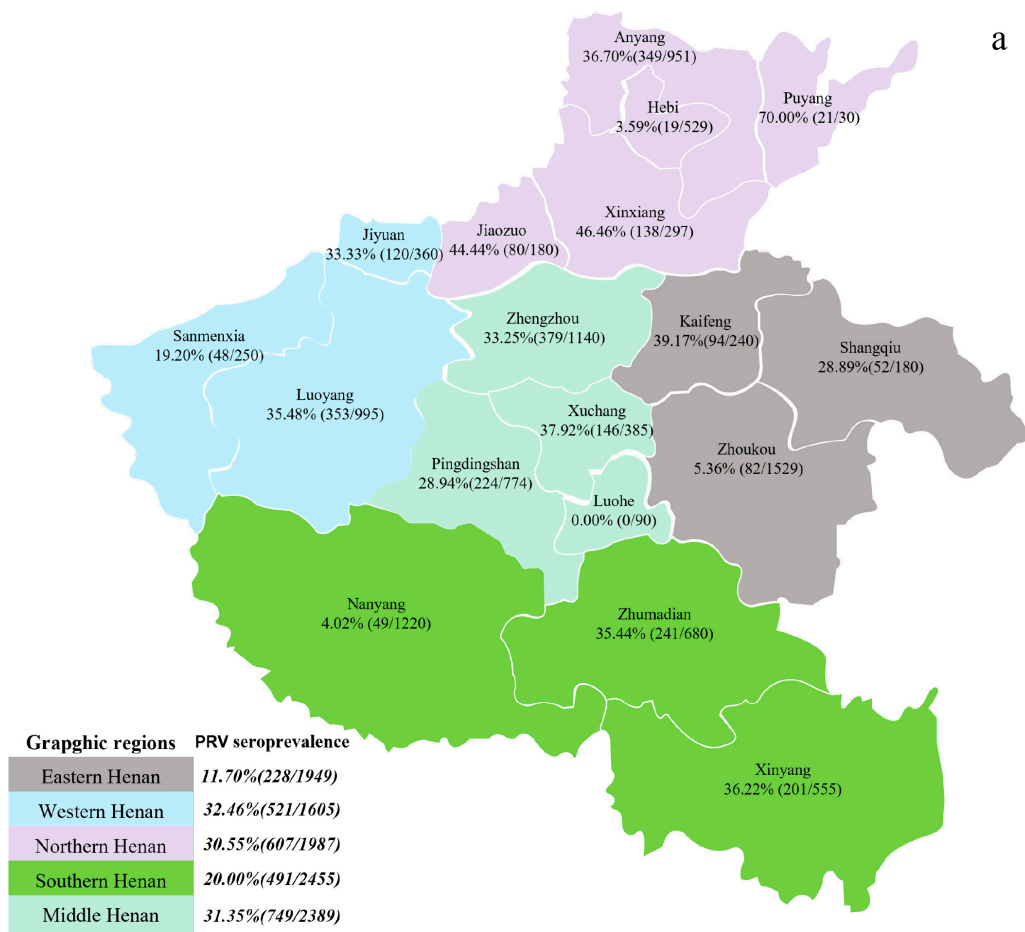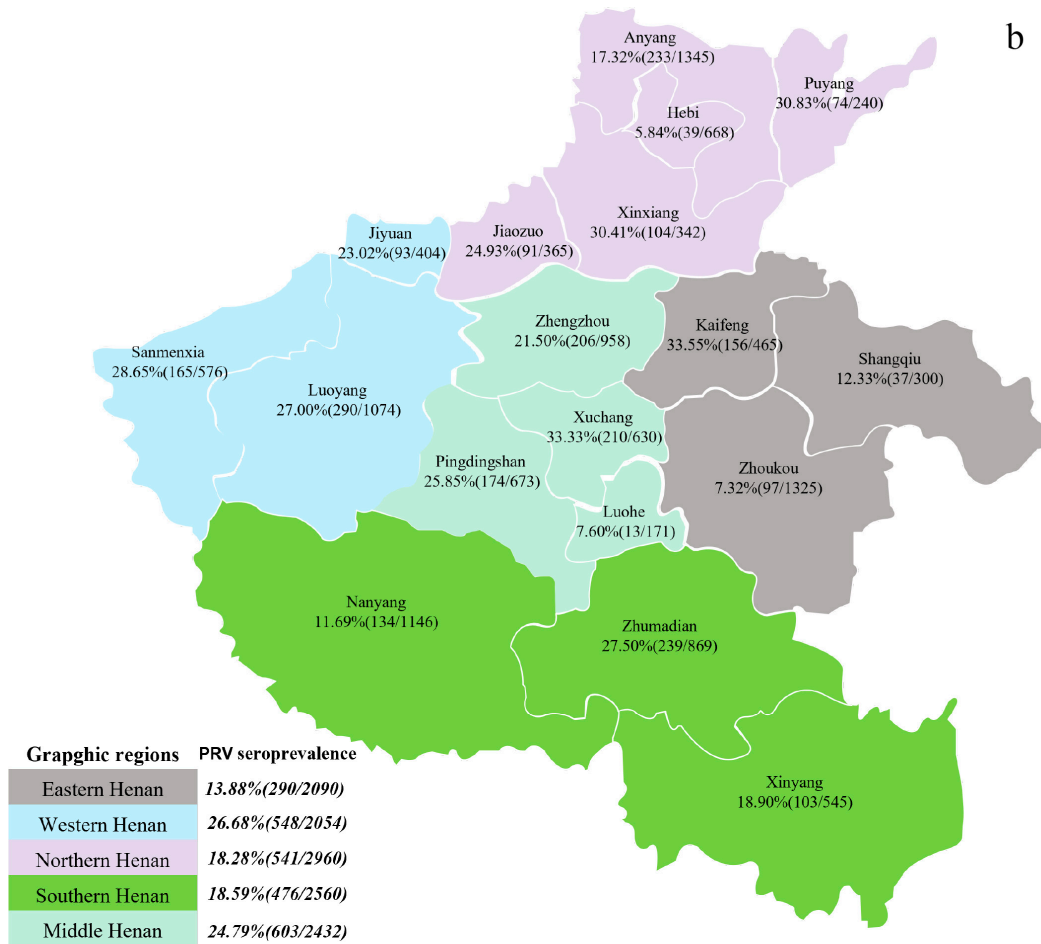

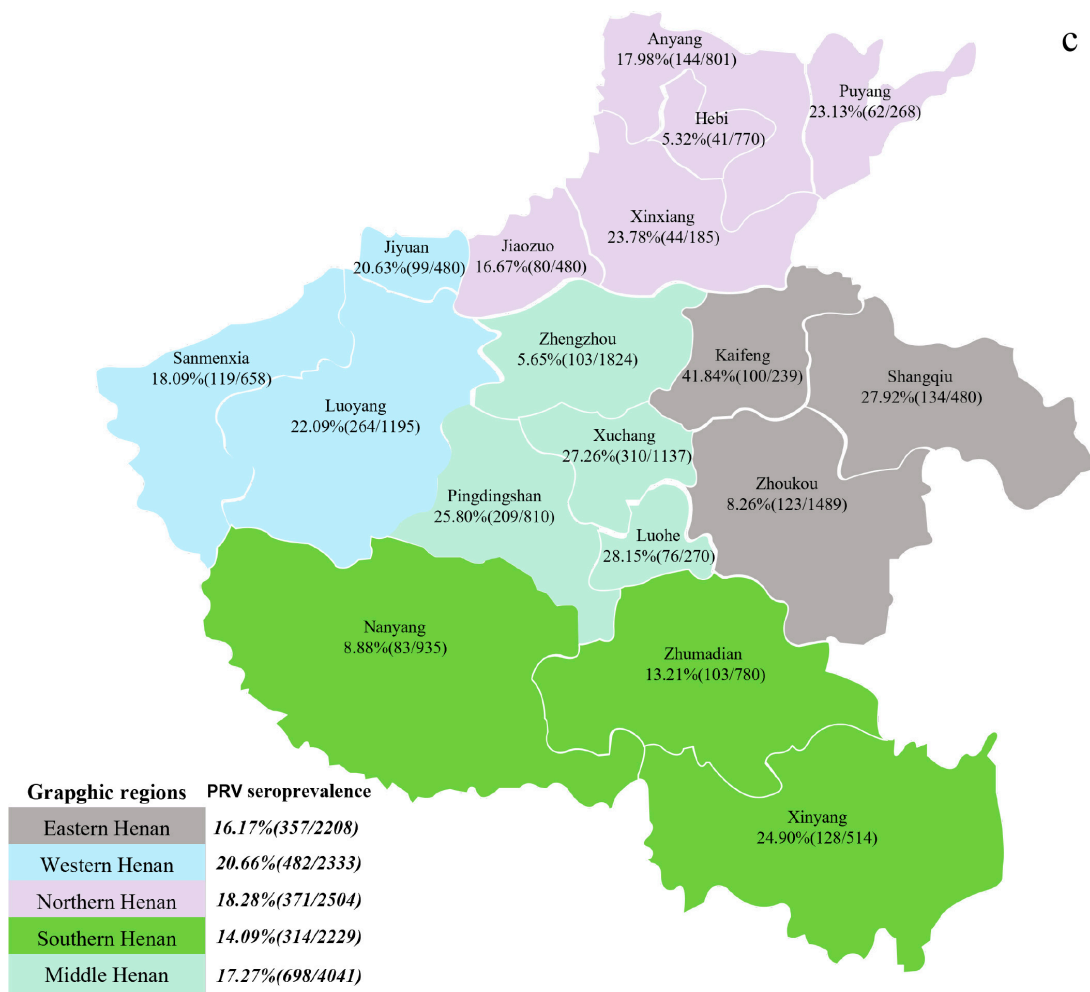

Figure S1. Seroprevalence of pseudorabies virus (PRV) in geographical distributions in Henan province of China from January to December. (a) Seroprevalence in 2019. (b) Seroprevalence in 2020. (c) Seroprevalence in 2021.
